# Supplementary material
Source: PubMed Central journal article supplement (PMC9764239)
Supplement: NIHMS1839607-supplement-Supplemental_Data_File___doc___tif__pdf__etc__.pdf [file NIHMS1839607-supplement-Supplemental_Data_File___doc___tif__pdf__etc__.pdf]

## **SUPPLEMENTARY CONTENT**

### **Appendix 1: Institutional Review Boards and Ethics Committees Approving Trial (NCT00351533)**

Human Subjects Division  
University of Washington Medical Center – Coordinating Center (IRB #45721)  
Seattle, Washington, United States

Human Subjects Division  
Harborview Medical Center  
Seattle, Washington, United States

Research Ethics Board  
St. Michael's Hospital  
Toronto, Ontario, Canada

Institutional Review Board  
St. Alphonsus Medical Center  
Boise, Idaho, United States

Research Protections Office  
Fletcher Allen Health Care  
Burlington, Vermont, United States

Data Safety Monitoring Board (DSMB)  
Appointed by the National Heart, Lung, and Blood Institute (NHLBI)

**Supplemental Figure 1. Alveolar biomarkers by plasma-derived and BALF-derived classes.** Each dot represents an individual measurement. Boxes indicate median and interquartile range; whiskers indicate minimum and maximum. Biomarkers are sorted by magnitude of difference between plasma-derived classes. ns = not significant, \*Nominal P < 0.05, and \*\*Bonferroni corrected P < 0.05 for difference between plasma-derived classes or BALF-derived classes using Mann Whitney U tests. Abbreviations: BALF = bronchoalveolar lavage fluid, G-CSF = granulocyte colony stimulating factor, IL-6 = interleukin-6, IL-8 = interleukin-8, % PMNs = % neutrophils of total leukocyte count, vWF = von Willebrand factor, IL-1RA = interleukin-1 receptor antagonist, IL-1b = interleukin-1 beta, IL-17A = interleukin-17A, MCP-1 = monocyte chemoattractant protein-1, sPD-L1 = soluble programmed cell death ligand 1, cell count = total leukocyte count, protein = total protein, 25-HC = 25-hydroxycholesterol, SP-D = surfactant protein D.

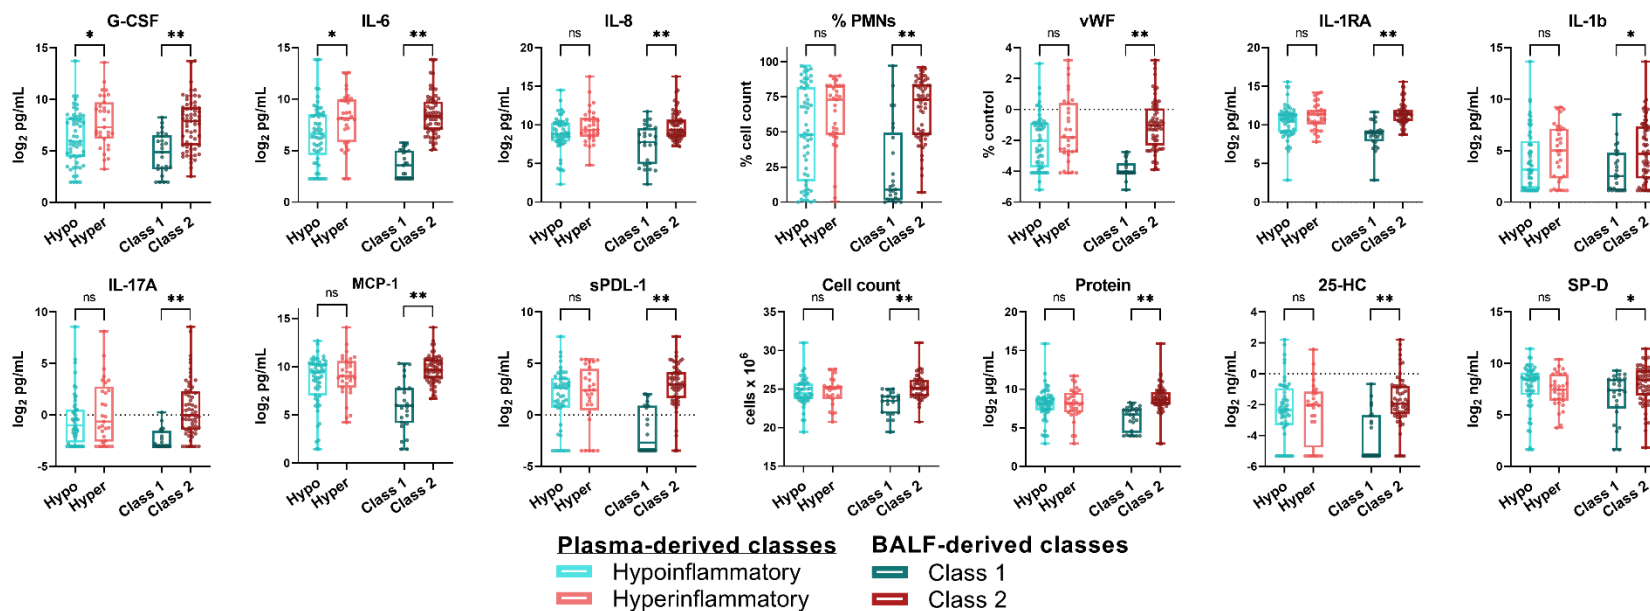

**Supplemental Table 1: BALF measurements excluded from analysis**

| Biomarkers                                      | Reason for exclusion             |
|-------------------------------------------------|----------------------------------|
| % lymphocytes                                   | correlated with % neutrophils    |
| % macrophages                                   | correlated with % neutrophils    |
| Tumor necrosis factor (TNF)                     | >25% at lower limit of detection |
| Interleukin-10 (IL-10)                          | >25% at lower limit of detection |
| Soluble programmed cell death ligand 2 (sPD-L2) | correlated with sPDL-1           |
| Soluble programmed cell death protein 1 (sPD-1) | correlated with sPDL-1           |
| Matrix metalloproteinase-28 (MMP-28)            | >25% at lower limit of detection |

**Supplemental Table 2: Alveolar biomarkers by plasma-derived and BALF-derived classes**

|                                         | Plasma Classes           |                           |       |               | BALF Classes     |                  |        |               |
|-----------------------------------------|--------------------------|---------------------------|-------|---------------|------------------|------------------|--------|---------------|
|                                         | Hypoinflammatory<br>N=57 | Hyperinflammatory<br>N=31 | P     | P<br>adjusted | Class 1<br>N=25  | Class 2<br>N=63  | P      | P<br>adjusted |
| IL-8, pg/mL                             | 449 (235-1227)           | 656 (350-1969)            | 0.069 | 0.966         | 218 (32-723)     | 640 (350-1629)   | <0.001 | 0.006         |
| IL-6, pg/mL                             | 100 (30-368)             | 282 (57-1009)             | 0.014 | 0.196         | 12 (5-31)        | 326 (131-868)    | <0.001 | <0.001        |
| G-CSF, pg/mL                            | 61 (22-295)              | 157 (72-846)              | 0.008 | 0.112         | 29 (9-86)        | 239 (46-603)     | <0.001 | <0.001        |
| MCP-1, pg/mL                            | 672 (133-1284)           | 530 (224-1526)            | 0.56  | >0.99         | 62 (19-222)      | 814 (454-1749)   | <0.001 | <0.001        |
| IL-17A, pg/mL                           | 0.50 (0.17-1.45)         | 0.64 (0.18-5.19)          | 0.34  | >0.99         | 0.12 (0.12-0.33) | 0.98 (0.37-4.92) | <0.001 | <0.001        |
| sPD-L1, pg/mL                           | 6 (2-12)                 | 5 (2-21)                  | 0.79  | >0.99         | 0 (0-2)          | 8 (3-18)         | <0.001 | <0.001        |
| IL-1RA, pg/mL                           | 1729 (537-2834)          | 2560 (1065-4080)          | 0.12  | >0.99         | 492 (242-602)    | 2623 (1448-4080) | <0.001 | <0.001        |
| SP-D, ng/mL                             | 347 (127-509)            | 176 (84-497)              | 0.16  | >0.99         | 169 (61-351)     | 333 (117-635)    | 0.020  | 0.280         |
| vWF, % control                          | 0.25 (0.07-0.54)         | 0.28 (0.14-1.35)          | 0.16  | >0.99         | 0.06 (0.06-0.08) | 0.48 (0.20-1.05) | <0.001 | <0.001        |
| IL-1b, pg/mL                            | 9 (3-49)                 | 32 (5-140)                | 0.13  | >0.99         | 6 (2-25)         | 25 (5-166)       | 0.008  | 0.109         |
| 25-HC, ng/mL                            | 0.20 (0.10-0.49)         | 0.25 (0.07-0.44)          | 0.84  | >0.99         | 0.03 (0.03-0.15) | 0.26 (0.16-0.58) | <0.001 | <0.001        |
| Total leukocyte count x 10 <sup>6</sup> | 22 (14-56)               | 36 (14-46)                | 0.69  | >0.99         | 12 (4-19)        | 36 (19-77)       | <0.001 | <0.001        |
| % PMN                                   | 48 (15-82)               | 73 (48-83)                | 0.10  | >0.99         | 9 (2-46)         | 73 (48-83)       | <0.001 | <0.001        |
| Total protein, µg/mL                    | 294 (158-505)            | 290 (128-750)             | 0.95  | >0.99         | 104 (24-175)     | 392 (268-790)    | <0.001 | <0.001        |

Median (interquartile range) listed for all variables. P values for Mann Whitney U tests, both nominal and Bonferroni-adjusted. Abbreviations: BALF = bronchoalveolar lavage fluid, IL-8 = interleukin-8, IL-6 = interleukin-6, G-CSF = granulocyte colony stimulating factor, MCP-1 = monocyte chemoattractant protein -1, IL-17A = interleukin-17A, sPDL-1 = soluble programmed cell death-ligand 1, IL-1RA = interleukin-1 receptor antagonist, SP-D = surfactant protein D, vWF = von Willebrand factor, IL-1b = interleukin-1 beta, 25-HC = 25-hydroxycholesterol, % PMN = % neutrophils of total leukocyte count, sTNFR-1 = soluble tumor necrosis factor receptor-1.

**Supplemental Table 3: Plasma biomarkers by plasma-derived and BALF-derived classes**

|                     | Plasma Classes           |                           |        | BALF Classes     |                   |        |
|---------------------|--------------------------|---------------------------|--------|------------------|-------------------|--------|
|                     | Hypoinflammatory<br>N=57 | Hyperinflammatory<br>N=31 | P      | Class 1<br>N=25  | Class 2<br>N=63   | P      |
| Bicarbonate, mmol/L | 25 (23-29)               | 21 (17-24)                | <0.001 | 24 (22-26)       | 25 (21-27)        | >0.99  |
| IL-8, pg/mL         | 20 (20-21)               | 35 (23-97)                | <0.001 | 20 (20-24)       | 21 (20-36)        | 0.28   |
| sTNFR-1, pg/mL      | 1853 (1353-2615)         | 4286 (2600-6524)          | <0.001 | 2441 (1660-3713) | 2237 (1471-4018)  | 0.78   |
| IL-6, pg/mL         | 58 (32-116)              | 151 (94-436)              | <0.001 | 52 (21-75)       | 121 (54-201)      | <0.001 |
| G-CSF, pg/mL        | 37 (21-83)               | 110 (16-431)              | 0.036  | 37 (16-58)       | 71 (22-161)       | 0.038  |
| MCP-1, pg/mL        | 165 (104-318)            | 259 (139-777)             | 0.033  | 144 (88-294)     | 229 (120-412)     | 0.078  |
| IL-17A, pg/mL       | 2.66 (1.31-6.49)         | 6.56 (2.69-22.18)         | 0.002  | 2.26 (1.02-3.66) | 4.92 (2.29-10.89) | 0.010  |
| sPDL-1, pg/mL       | 80 (69-115)              | 149 (94-177)              | <0.001 | 82 (71-132)      | 106 (72-143)      | 0.34   |
| IL-1RA, pg/mL       | 1976 (1154-3081)         | 4501 (2404-11282)         | <0.001 | 2201 (1227-3081) | 2447 (1325-5137)  | 0.26   |
| SP-D, ng/mL         | 122 (65-179)             | 123 (47-253)              | 0.79   | 61 (33-173)      | 128 (72-223)      | 0.031  |
| vWF, % control      | 211 (151-536)            | 292 (184-629)             | 0.24   | 205 (141-349)    | 297 (162-586)     | 0.13   |

Median (interquartile range) listed for all variables. P values for Mann Whitney U tests, uncorrected for multiple hypothesis testing. Abbreviations: BALF = bronchoalveolar lavage fluid, IL-8 = interleukin-8, IL-6 = interleukin-6, G-CSF = granulocyte colony stimulating factor, MCP-1 = monocyte chemoattractant protein -1, IL-17A = interleukin-17A, sPDL-1 = soluble programmed cell death-ligand 1, IL-1RA = interleukin-1 receptor antagonist, SP-D = surfactant protein D, vWF = von Willebrand factor, IL-1b = interleukin-1 beta, 25-HC = 25-hydroxycholesterol, % PMN = % neutrophils of total leukocyte count, sTNFR-1 = soluble tumor necrosis factor receptor-1.

**Supplemental Table 4: Alveolar biomarkers by PaO<sub>2</sub> to FIO<sub>2</sub> ratio > 150 and ≤ 150**

|                              | PaO <sub>2</sub> :FIO <sub>2</sub> > 150<br>N=51 | PaO <sub>2</sub> :FIO <sub>2</sub> ≤150<br>N=37 | P      |
|------------------------------|--------------------------------------------------|-------------------------------------------------|--------|
| IL-8, pg/mL                  | 529 (187-1542)                                   | 486 (350-1345)                                  | 0.52   |
| IL-6, pg/mL                  | 111 (28-368)                                     | 282 (78-815)                                    | 0.026  |
| G-CSF, pg/mL                 | 122 (31-448)                                     | 84 (23-295)                                     | 0.59   |
| MCP-1, pg/mL                 | 471 (90-1227)                                    | 814 (328-1526)                                  | 0.075  |
| IL-17A, pg/mL                | 0.42 (0.12-1.62)                                 | 0.75 (0.33-3.31)                                | 0.080  |
| sPDL-1, pg/mL                | 4 (1-8)                                          | 9 (2-20)                                        | 0.034  |
| IL-1RA, pg/mL                | 1451 (464-3225)                                  | 2046 (1437-3203)                                | 0.11   |
| SP-D, ng/mL                  | 260 (91-509)                                     | 233 (98-491)                                    | 0.95   |
| vWF, %                       | 0.15 (0.07-0.48)                                 | 0.51 (0.17-1.13)                                | 0.006  |
| IL-1b, pg/mL                 | 21 (3-176)                                       | 9 (4-71)                                        | 0.34   |
| 25-OH cholesterol, ng/mL     | 0.16 (0.03-0.27)                                 | 0.40 (0.16-0.61)                                | 0.001* |
| Cell count x 10 <sup>6</sup> | 31 (12-54)                                       | 22 (18-49)                                      | 0.55   |
| % PMN                        | 51 (15-83)                                       | 69 (46-82)                                      | 0.15   |
| Total protein, µg/ml         | 268 (103-376)                                    | 426 (233-898)                                   | 0.001* |

Median (interquartile range) listed for all variables. P values for Mann Whitney U tests, uncorrected for multiple hypothesis testing. \*Bonferroni corrected P < 0.05

**Supplemental Table 5: BALF-to-plasma ratios of biomarkers, stratified by ARDS etiology**

|                                                          | <b>Total<br/>N=87</b> | <b>Indirect<br/>N=39</b> | <b>Direct<br/>N=48</b> | <b>P</b> |
|----------------------------------------------------------|-----------------------|--------------------------|------------------------|----------|
| <b>Ratios of BALF-to-plasma biomarker concentrations</b> |                       |                          |                        |          |
| Ratio IL-6                                               | 1.28 (0.45-5.07)      | 1.11 (0.47-4.89)         | 1.80 (0.43-5.12)       | 0.44     |
| Ratio IL-8                                               | 19.07 (9.08-49.74)    | 14.24 (9.14-47.49)       | 23.32 (8.70-64.52)     | 0.49     |
| Ratio MCP-1                                              | 2.92 (0.74-6.31)      | 2.61 (0.58-6.17)         | 3.32 (0.82-7.46)       | 0.51     |
| Ratio G-CSF                                              | 1.54 (0.61-4.97)      | 1.88 (0.66-4.97)         | 1.35 (0.58-4.89)       | 0.46     |
| Ratio IL-1RA                                             | 0.64 (0.30-1.80)      | 0.45 (0.22-0.89)         | 0.87 (0.43-2.55)       | 0.005    |
| Ratio IL-17a                                             | 0.17 (0.08-0.55)      | 0.12 (0.07-0.32)         | 0.29 (0.10-0.80)       | 0.046    |
| Ratio sPDL-1                                             | 0.05 (0.01-0.13)      | 0.04 (0.01-0.11)         | 0.06 (0.01-0.17)       | 0.13     |
| Ratio SP-D                                               | 2.50 (0.75-5.33)      | 2.67 (1.22-6.75)         | 1.94 (0.33-4.53)       | 0.12     |
| <b>BALF biomarker concentrations</b>                     |                       |                          |                        |          |
| BALF IL-6, pg/mL                                         | 150 (36-489)          | 141 (36-400)             | 164 (40-747)           | 0.57     |
| BALF IL-8, pg/mL                                         | 498 (254-1399)        | 471 (292-1212)           | 640 (235-1640)         | 0.40     |
| BALF MCP-1, pg/mL                                        | 672 (205-1344)        | 672 (205-1360)           | 605 (197-1260)         | 0.77     |
| BALF G-CSF, pg/mL                                        | 110 (27-448)          | 123 (37-344)             | 78 (22-627)            | 0.87     |
| BALF IL-1RA, pg/mL                                       | 1904 (602-3225)       | 1368 (537-2372)          | 2591 (1344-3557)       | 0.006    |
| BALF IL-17a, pg/mL                                       | 0.56 (0.18-2.08)      | 0.33 (0.12-1.06)         | 0.92 (0.37-4.92)       | 0.009    |
| BALF sPDL-1, pg/mL                                       | 5 (2-13)              | 3 (2-8)                  | 7 (2-21)               | 0.13     |
| BALF SP-D, ng/mL                                         | 260 (98-500)          | 333 (163-446)            | 239 (77-514)           | 0.49     |
| <b>Plasma biomarker concentrations</b>                   |                       |                          |                        |          |
| Plasma IL-6, pg/mL                                       | 84 (44-173)           | 86 (52-184)              | 80 (30-162)            | 0.32     |
| Plasma IL-8, pg/mL                                       | 20 (20-36)            | 21 (20-40)               | 20 (20-31)             | 0.67     |
| Plasma MCP-1, pg/mL                                      | 201 (113-342)         | 284 (120-452)            | 189 (89-310)           | 0.083    |
| Plasma G-CSF, pg/mL                                      | 46 (20-124)           | 79 (24-121)              | 37 (19-141)            | 0.38     |
| Plasma IL-1RA, pg/mL                                     | 2355 (1302-4670)      | 2380 (1278-4389)         | 2298 (1313-5159)       | 0.97     |
| Plasma IL-17a, pg/mL                                     | 3.58 (1.59-9.61)      | 2.69 (1.31-6.49)         | 4.89 (2.26-10.22)      | 0.15     |
| Plasma sPDL-1, pg/mL                                     | 96 (71-141)           | 94 (71-137)              | 104 (71-143)           | 0.78     |
| Plasma SP-D, ng/mL                                       | 122 (58-213)          | 105 (45-170)             | 139 (67-271)           | 0.13     |

Table includes both ratios as well as the constituent BALF and plasma biomarkers used to calculate ratios. Median (interquartile range) listed for all variables. P values for Mann Whitney U tests. 1 out of 88 patients in this manuscript did not have ARDS etiology ascertained and was excluded in this table. Abbreviations: BALF = bronchoalveolar lavage fluid, IL-6 = interleukin-6, IL-8 = interleukin-8, MCP-1 = monocyte chemoattractant protein -1, G-CSF = granulocyte colony stimulating factor, IL-1RA = interleukin-1 receptor antagonist, IL-17A = interleukin-17A, sPDL-1 = soluble programmed cell death-ligand 1, SP-D = surfactant protein D.
